# Supplementary material
Source: Research Square preprint supplement (doi:10.21203/rs.3.rs-8759759/v1)
Supplement: Supplementary file 1 [file c94e11c83346d482ebbba41e.docx]

**Supplementary Information**

*for the manuscript entitled:*

“ **Electrospun poly (vinyl alcohol) - chitosan nanofibers integrated with mangiferin: fabrication and properties**”

*Authors:* Thi Hong Nhung Vu1*, Svetlana N. Morozkina2,3, Vera E. Sitnikova3, Yuliya E. Generalova4, Quang Sang Nguyen5, Mayya V. Uspenskaya2

**Corresponding author:* Thi Hong Nhung Vu, Email: [vuhongnhungs@gmail.com](mailto:vuhongnhungs@gmail.com)

**Additional figures**





**Figure S1.** Chemical model for mangiferin pKa's assignment


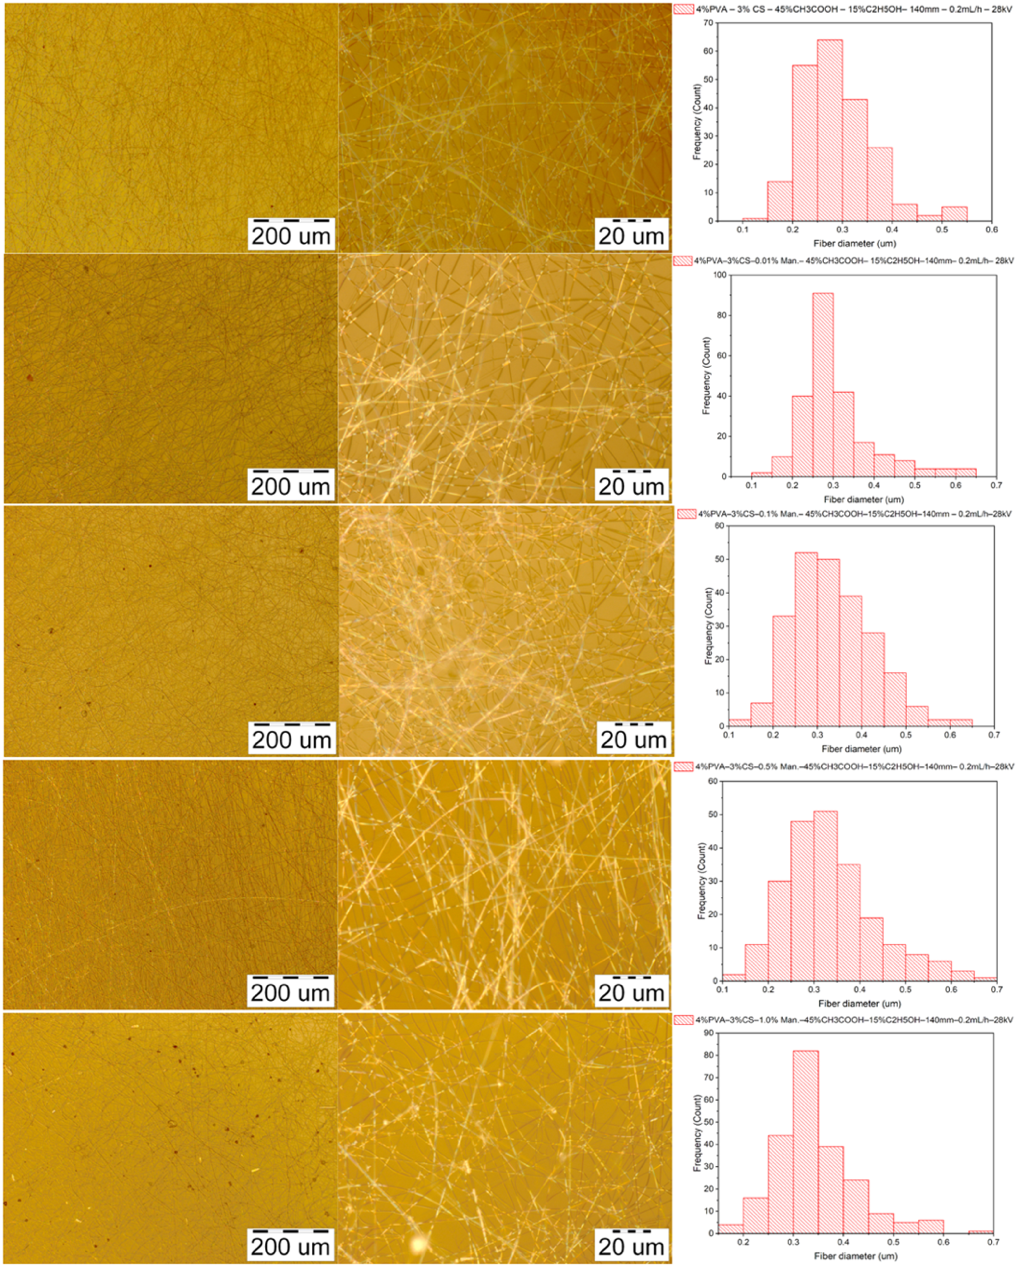


**Figure S2.** Microscopic images of nanofibers from solutions of 4% PVA - 3% CS - mangiferin at 100- and 1000-fold magnification and their diameter distribution. (Electrospinning parameters: needle-collector distance of 140 mm, feed rate of 0.2 ml/h and voltage of 28 kV).


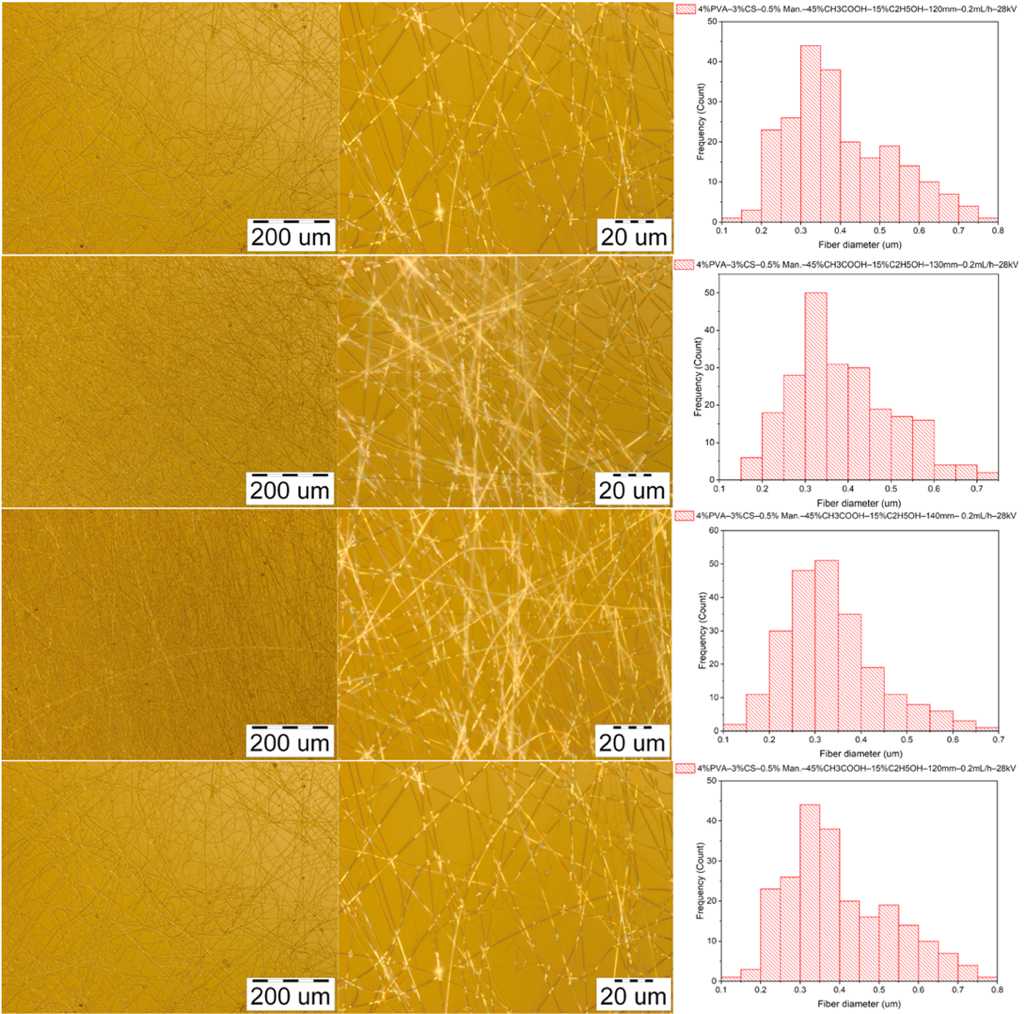


**Figure S3.** Microscopic images of nanofibers from solutions of 4% PVA - 3% CS – 0.5% mangiferin at 100- and 1000-fold magnification and their diameter distribution. (Electrospinning parameters: needle-collector distance of 120-150 mm, feed rate of 0.2 mL/h and voltage of 28 kV).


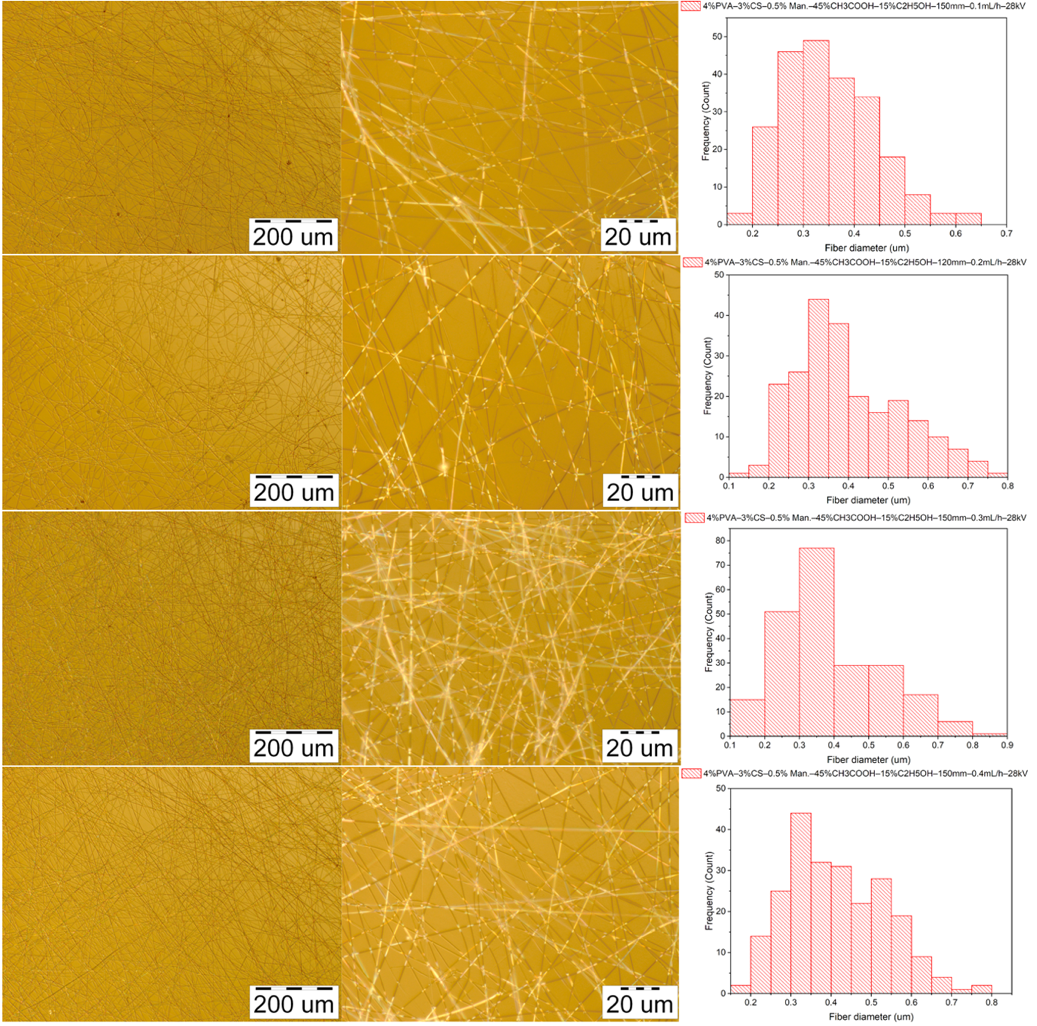


**Figure S4.** Microscopic images of nanofibers from solutions of 4% PVA - 3% CS – 0.5% mangiferin at 100- and 1000-fold magnification and their diameter distribution. (Electrospinning parameters: needle-collector distance of 150 mm, feed rate of 0.1 – 0.4 mL/h and voltage of 28 kV).


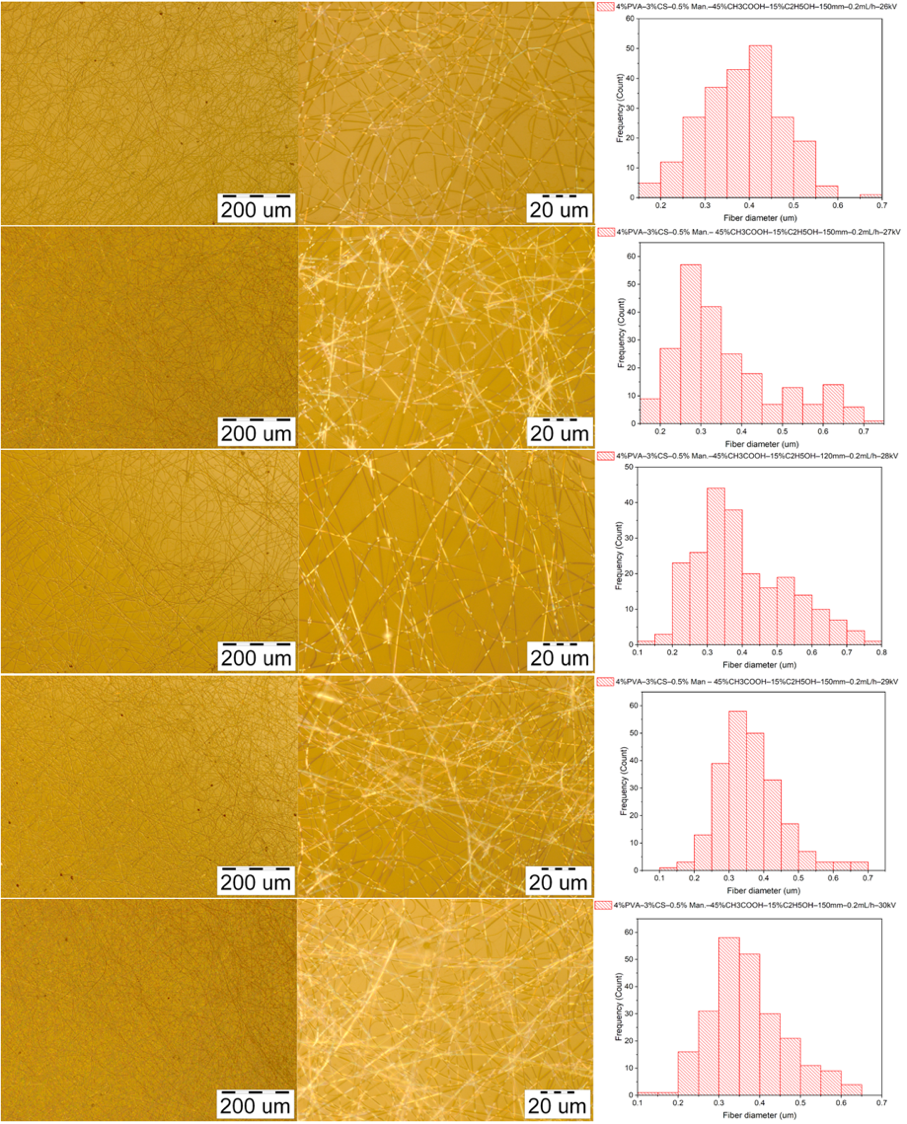


**Figure S5.** Microscopic images of nanofibers from solutions of 4% PVA - 3% CS – 0.5% mangiferin at 100- and 1000-fold magnification and their diameter distribution. (Electrospinning parameters: needle-collector distance of 150 mm, feed rate of 0.2 mL/h and voltage of 26 – 30 kV).


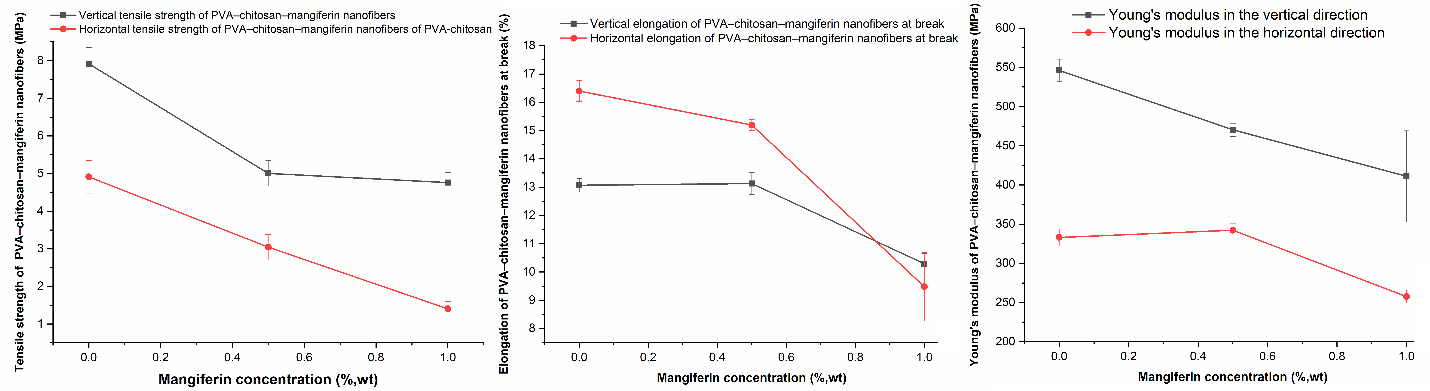


**Figure S6.** Changes in tensile properties of PVA – CS – mangiferin nanofibers


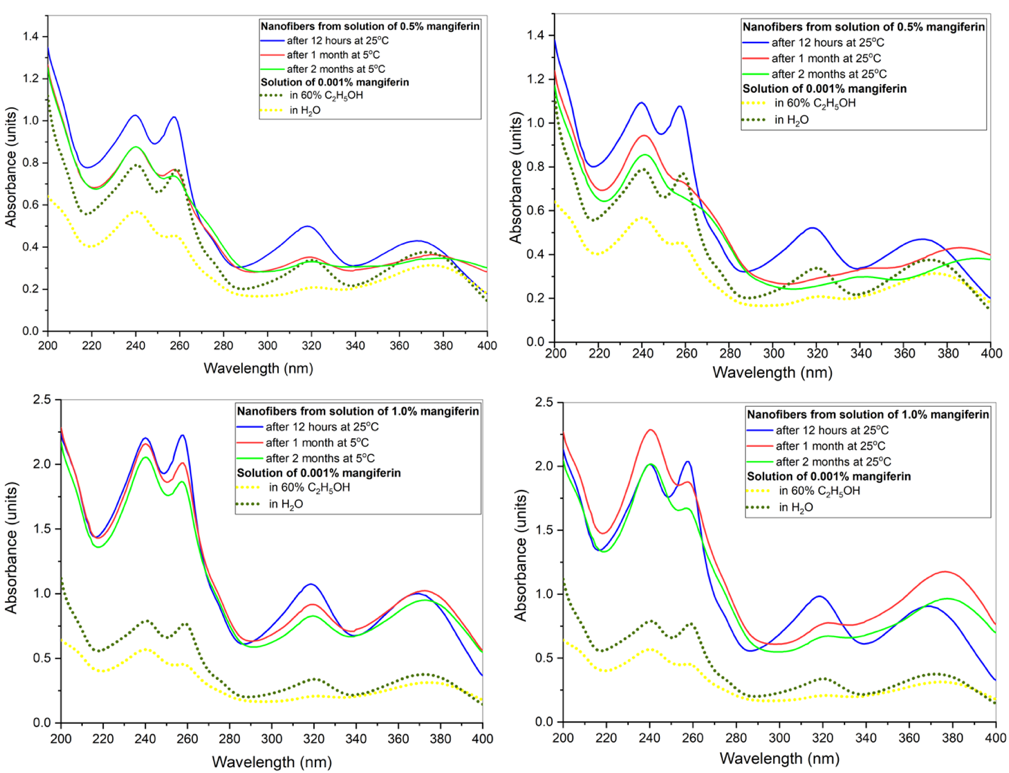


**Figure S7.** Changes in the UV-visible spectra of aqueous solutions of PVA–chitosan–mangiferin nanofibers during storage


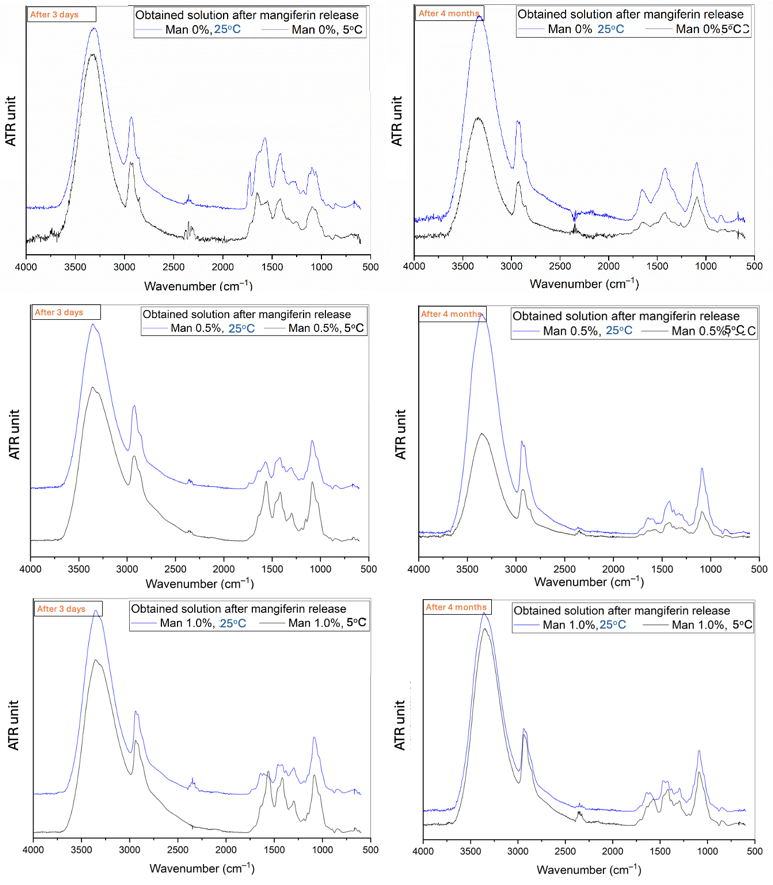


**Figure S8.** IR spectra of solutions of the studied nanofibers after 4 months of storage in water


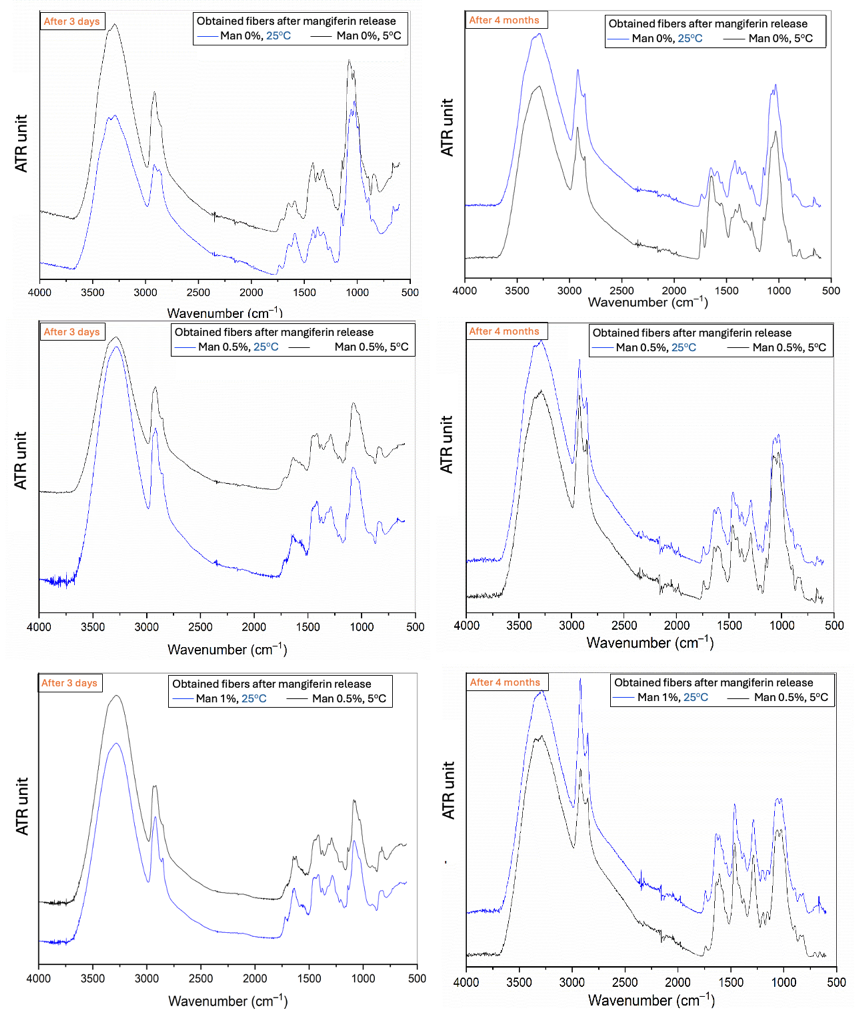


**Figure S9.** IR spectra of fibers of the studied nanofibers after 4 months of storage in water

**References**

[S1] B. Gómez-Zaleta, M.T. Ramírez-Silva, A. Gutiérrez, E. González-Vergara, M. Güizado-Rodríguez, A. Rojas-Hernández, UV/vis, 1H, and 13C NMR spectroscopic studies to determine mangiferin pKa values, Spectrochim Acta A Mol Biomol Spectrosc 64 (2006) 1002–1009. https://doi.org/10.1016/j.saa.2005.09.009.
